# Supplementary material
Source: ML conference proceedings conference paper supplement (https://proceedings.mlr.press/v32/inouye14.html)
Supplement: Supplementary file 1 [file inouye14-supp.pdf]

## Admixture of Poisson MRFs

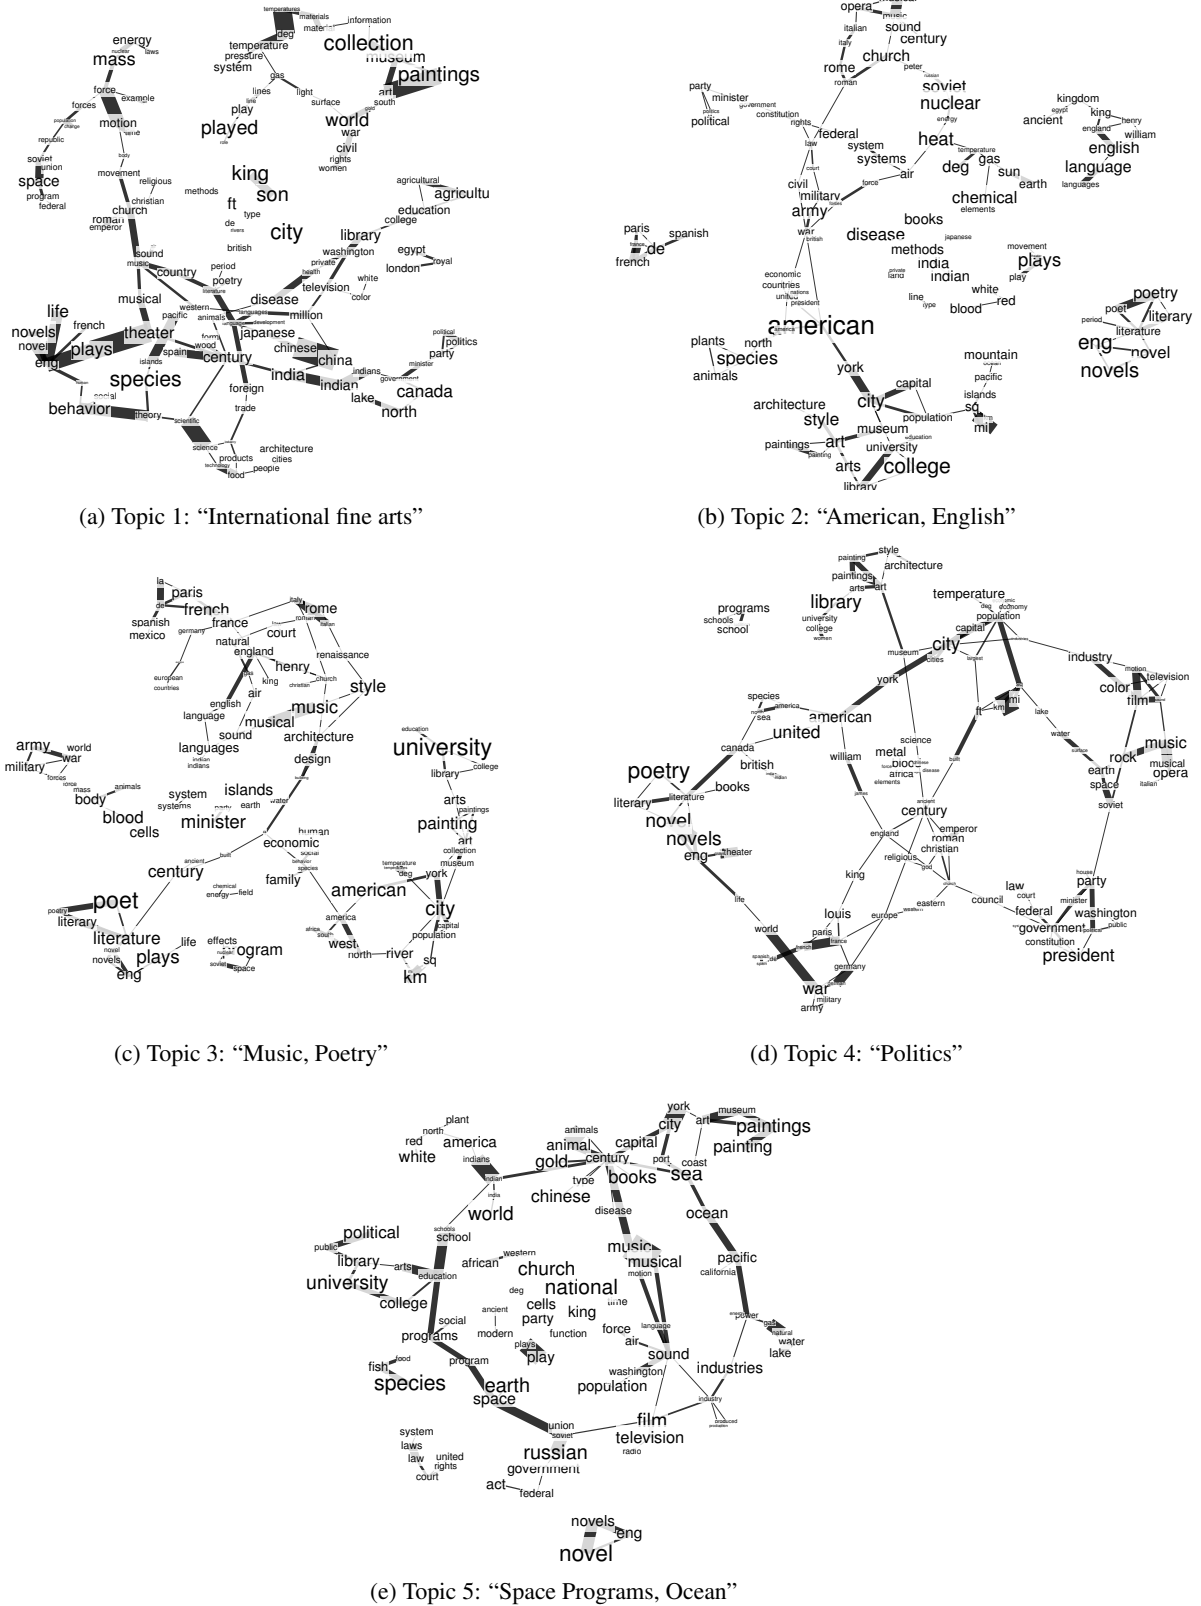

Figure 6: Visualizations of the topic PMRFs of an APM provide many interesting and intuitive ideas regarding the text corpus (only positive dependencies are shown).

Table 1: APM Top Words (UMass Coherence Scores in Parenthesis)

| Topic 1<br>(-50) | Topic 2<br>(-78) | Topic 3<br>(-55) | Topic 4<br>(-28) | Topic 5<br>(-63) | Topic 6<br>(-62) | Topic 7<br>(-49) | Topic 8<br>(-39) | Topic 9<br>(-59) | Topic 10<br>(-35) |
|------------------|------------------|------------------|------------------|------------------|------------------|------------------|------------------|------------------|-------------------|
| edu              | system           | window           | com              | re               | peopl            | com              | edu              | 0                | god               |
| com              | program          | organ            | write            | organ            | god              | peopl            | re               | 1                | christian         |
| nntp             | file             | line             | re               | subject          | armenian         | dont             | organ            | 2                | jesus             |
| host             | edu              | subject          | articl           | line             | christian        | write            | nntp             | 3                | believ            |
| file             | imag             | comput           | car              | write            | dont             | gun              | line             | 4                | peopl             |
| window           | includ           | re               | organ            | christian        | believ           | govern           | host             | 5                | edu               |
| line             | window           | univers          | dont             | god              | time             | articl           | write            | 6                | write             |
| organ            | avail            | nntp             | edu              | univers          | live             | re               | subject          | 7                | re                |
| imag             | version          | thank            | line             | articl           | i'm              | i'm              | post             | 8                | articl            |
| subject          | inform           | file             | post             | govern           | mean             | time             | car              | 9                | exist             |

Table 2: LDA Top Words (UMass Coherence Scores in Parenthesis)

| Topic 1<br>(-96) | Topic 2<br>(-75) | Topic 3<br>(-27) | Topic 4<br>(-45) | Topic 5<br>(-69) | Topic 6<br>(-81) | Topic 7<br>(-61) | Topic 8<br>(-201) | Topic 9<br>(-107) | Topic 10<br>(-85) |
|------------------|------------------|------------------|------------------|------------------|------------------|------------------|-------------------|-------------------|-------------------|
| space            | god              | com              | edu              | dont             | drive            | 1                | edu               | peopl             | file              |
| system           | peopl            | write            | post             | i'm              | line             | 2                | univers           | game              | window            |
| inform           | believ           | re               | host             | time             | system           | 0                | write             | govern            | program           |
| key              | christian        | articl           | nntp             | look             | card             | 3                | re                | gun               | imag              |
| research         | mean             | line             | organ            | car              | subject          | 4                | articl            | time              | version           |
| chip             | question         | subject          | line             | i`v              | organ            | 5                | line              | armenian          | run               |
| public           | word             | organ            | subject          | write            | comput           | 6                | subject           | team              | list              |
| nasa             | exist            | ca               | univers          | lot              | disk             | 7                | organ             | kill              | avail             |
| gov              | book             | post             | uk               | try              | driver           | 8                | maxaxaxaxa        | plai              | grafic            |
| center           | jesus            | nntp             | distribut        | cant             | price            | 10               | cs                | american          | color             |
